# Supplementary material for: Mitigating hydrogen gas evolution in high nickel cathodes using single-crystalline NCM particles
Source: Royal Society of Chemistry journal article supplement (doi:10.1039/d4ta04615c), 2024-01-01
Supplement: d4ta04615c1.pdf [file d4ta04615c1.pdf]

## Supporting Information

# Mitigating Hydrogen Gas Evolution in High Nickel Cathodes Using Single-Crystalline NCM Particles

*Nyung Joo Kong<sup>‡</sup>, Jee Ho Ha<sup>‡</sup>, Yeon Jeong Hwang, Yujin Kim, Byung Un Hwang, Kyeong-*

*Min Jeong, Jaephil Cho\* and Seok Ju Kang\**

---

Department of Energy Engineering, School of Energy and Chemical Engineering, Ulsan National Institute of Science and Technology (UNIST), Ulsan 44919, Republic of Korea; [orcid.org/0000-0002-9921-6674](https://orcid.org/0000-0002-9921-6674); Email: [jpcho@unist.ac.kr](mailto:jpcho@unist.ac.kr), [sjkang@unist.ac.kr](mailto:sjkang@unist.ac.kr) <sup>‡</sup>These authors contributed equally to this work.

## SUPPORTING TABLE AND FIGURES

**Table S1.** Rietveld refinement results for poly- and single-crystal-NCM particles, representing the cation mixing ratio based on the lattice constants of  $a$  and  $c$ .

|        | a      | c       | Cation mixing |
|--------|--------|---------|---------------|
| PC-NCM | 2.8739 | 14.2041 | 1.404%        |
| SC-NCM | 2.8790 | 14.1968 | 2.868%        |

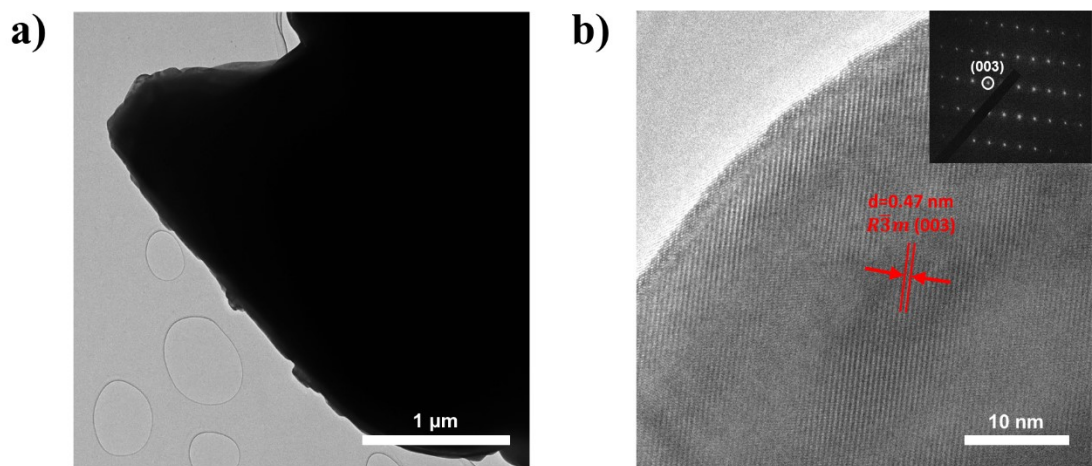

**Figure S1.** a) Bright field TEM image of single-crystal NCM on a holey carbon-supported Cu grid. b) High-resolution TEM image and corresponding SAED pattern of single-crystal NCM.

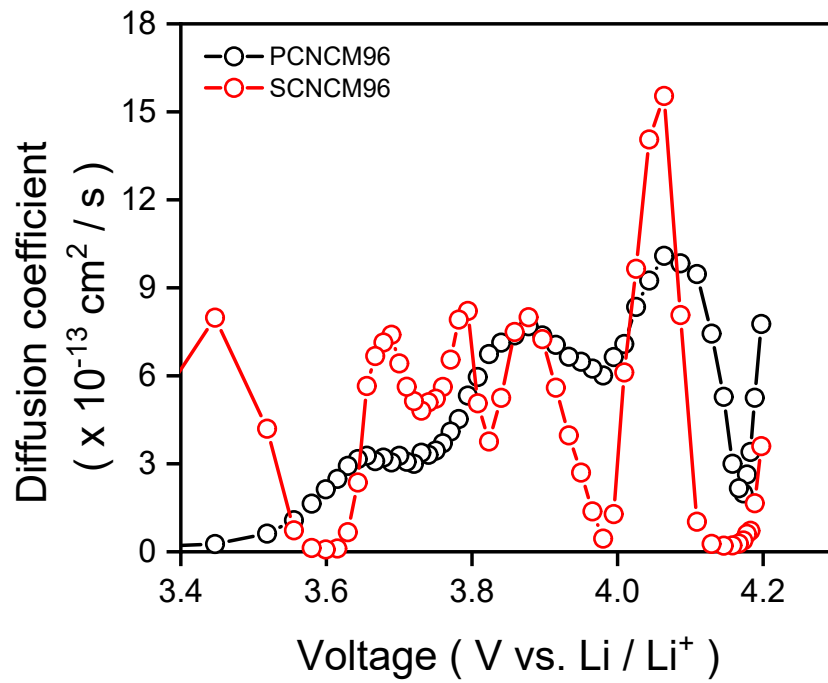

**Figure S2.** Li diffusivity coefficients for poly- and single-crystal NCM cathodes.

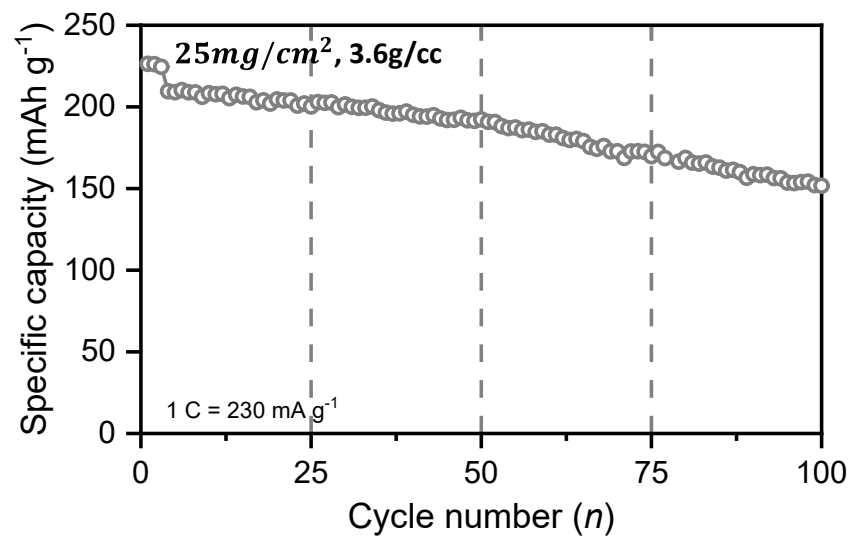

**Figure S3.** Cycling performance of high tap density single-crystal NCM cathodes at a current density of 0.2C.

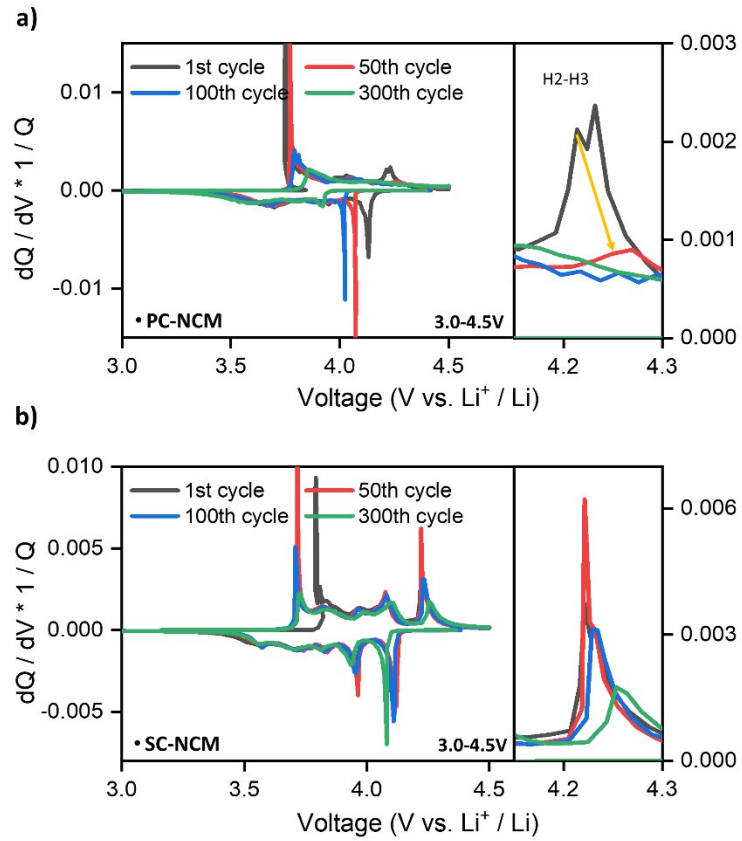

**Figure S4.** Plots of  $dQ/dV$  versus voltage for a) poly- and b) single-crystal NCM cathodes during the cycling process. Right panels in a) and b) show magnified views of the H2-H3 phase transition redox peaks from the main panels.

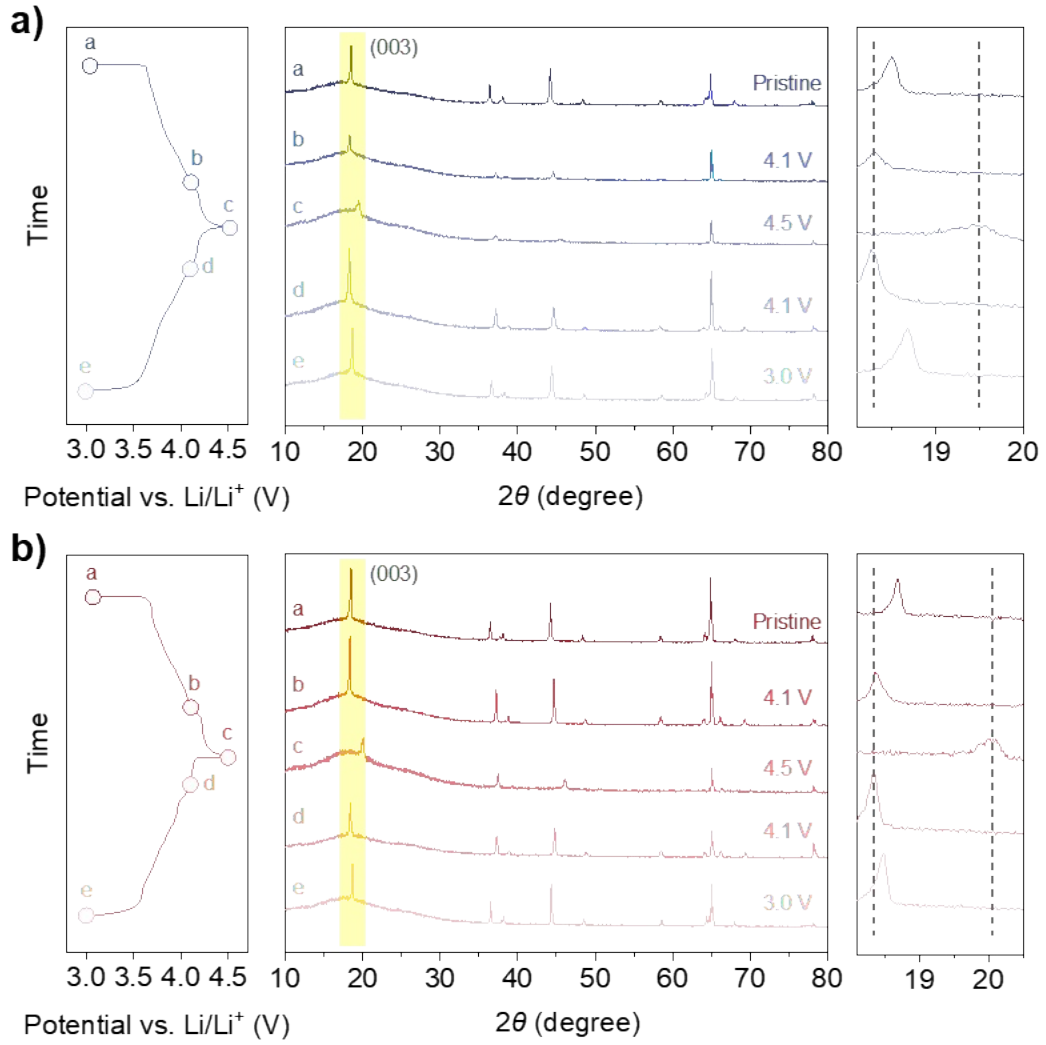

**Figure S5.** Ex-situ XRD patterns of a) poly- and b) single-crystal NCM cathodes at various charge and discharge states.

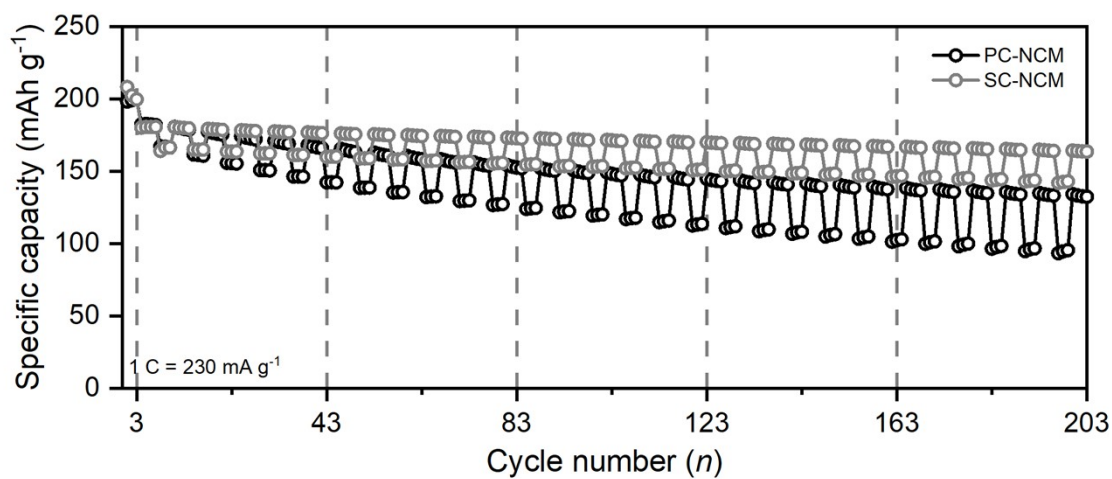

**Figure S6.** Cycling performance of full cells containing poly-(black) and single-crystal (grey) NCM cathodes under the charge conditions: four normal (0.5 C) and three fast (3 C) charge protocols.



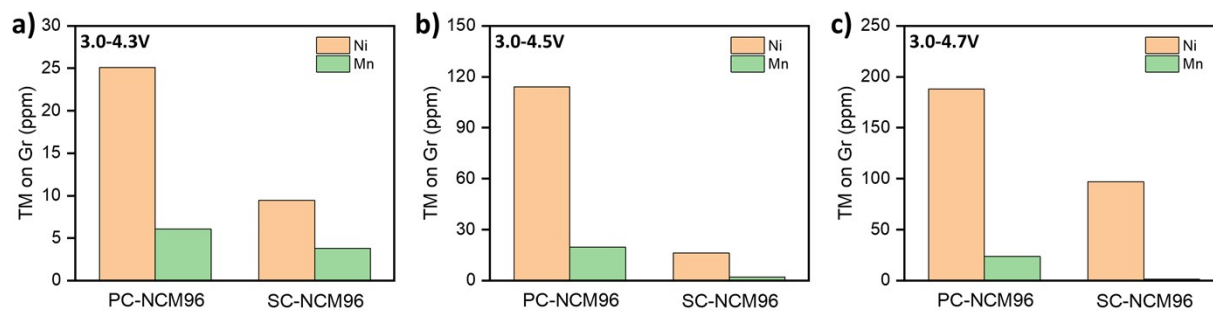

**Figure S7.** ICP-OES results for 1000 cycled graphite anodes in full cells containing poly- and single-crystal cathodes, under various cutoff conditions: a) 3.0–4.3 V, b) 3.0–4.5 V, and c) 3.0–4.7 V.

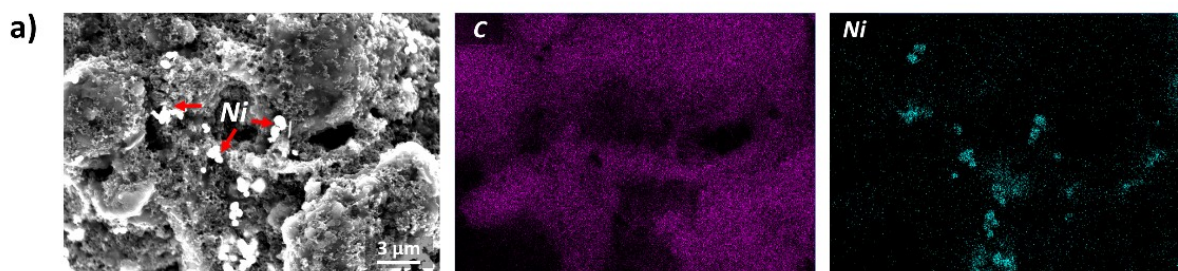

b) •PC-NCM96 || Gr + Ni

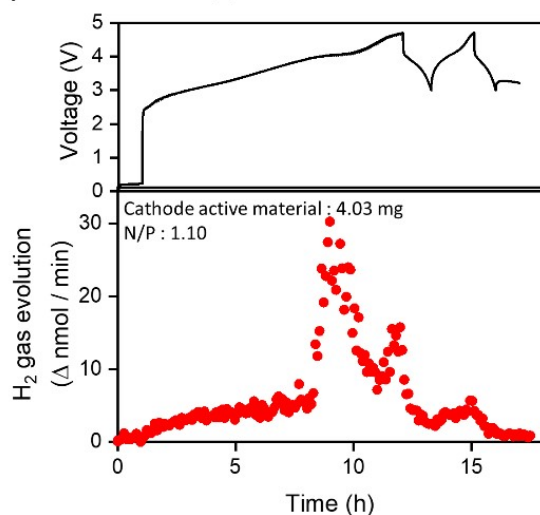

•SC-NCM96 || Gr + Ni

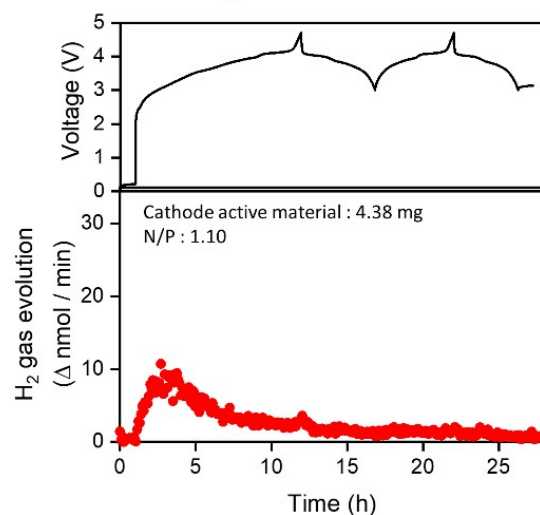

**Figure S8.** a) SEM image and corresponding EDS elemental mapping of graphite electrode with 5 wt% Ni powder composite. b) Initial galvanostatic charge and discharge profiles with corresponding  $H_2$  evolution for full cells containing (b) poly- and (c) single-crystal NCM cathodes paired with graphite anodes with 5 wt% Ni powder.

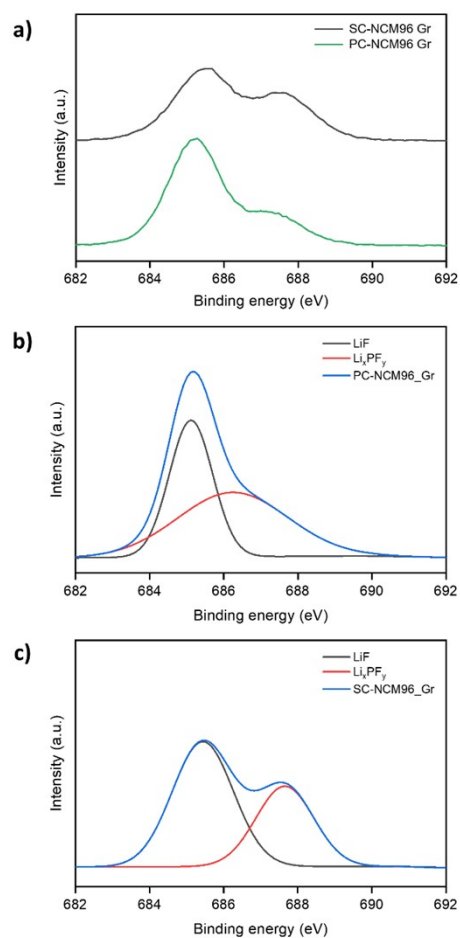

**Figure S9.** High resolution F 1s XPS spectra of a) pristine poly- and single-crystal-NCM cathodes and cycled b) poly- and c) single-crystal-NCM cathodes. The deconvolution in b) and c) shows the relative amount of LiF (black line) in cycled graphite anodes.
